# Supplementary material for: Monitoring the response to Nintedanib treatment in a mouse model of lung fibrosis using longitudinal X-ray based lung function measurement
Source: Research Square preprint supplement (doi:10.21203/rs.3.rs-2780852/v1), 2023-04-12
Supplement: Supplementary file 1 [file 37a248a3aa9b5f38fa04111a.docx]

**Monitoring the response to Nintedanib treatment in a mouse model of lung fibrosis using longitudinal X-ray based lung function measurement**

Amara Khan1, Andrea M. Markus1, Angelika Svetlove1,2, Swen Hülsmann3, Frauke Alves1,2,4,5 and Christian Dullin1,5,6,7*

**S1**: **Animal data:**

The mice used for correlative lung function and volume measurements were all age (13 weeks), strain (C57Bl/6) and gender (male) matched. This was done to reduce the number of factors that may influence the lung function measurements. All mice were assigned.

**Table S1: Data for the mice including body weights and treatment groups.**

| Mouse no. | Body weight (g)  on baseline (Day 0) | Group |
| --- | --- | --- |
| 1 | 26.6 | Healthy |
| 2 | 25.0 | Healthy |
| 3 | 24.9 | Healthy |
| 4 | 28.2 | Healthy |
| 5 | 26.0 | Treated |
| 6 | 25.6 | Treated |
| 7 | 25.0 | Treated |
| 8 | 27.6 | Treated |
| 9 | 24.0 | Treated |
| 10 | 25.6 | Treated |
| 11 | 26.2 | Treated |
| 12 | 29.0 | Untreated |
| 13 | 26.0 | Untreated |
| 14 | 25.2 | Untreated |
| 15 | 27.7 | Untreated |
| 16 | 28.4 | Untreated |
